# Supplementary material for: Multiple clonal types of nonvaccine serotypes constitute β-lactams nonsusceptible pneumococcus isolates from adult pneumonia patients in Japan
Source: Research Square preprint supplement (doi:10.21203/rs.3.rs-453017/v1), 2021-05-07
Supplement: Supplementary file 1 [file 2118809278112ec6b510da6d.docx]

Additional Table 2. Differences in clinical characteristics, outcomes, and serotype distribution in study patients by pneumococcal β-lactam susceptibility

|  | With a β-lactam- susceptible isolate  n=161 (80.5%) | With a β-lactam-  nonsusceptible isolate  n=39 (19.5%) | p |
| --- | --- | --- | --- |
| Median age (range) | 73 (18-95) | 71 (18-91) | 0.2556 |
| Sex (male%) | 93 (57.8) | 27 (69.2) | 0.19 |
| CAP (%) | 127 (78.9) | 32 (82.1) | 0.66 |
| Inpatients (%) | 101 (62.7) | 26 (66.7) | 0.647 |
| Past PPSV23 history (%) |  |  |  |
| Yes | 47 (29.2) | 8 (20.5) | 0.276 |
| No | 87 (54.0) | 23 (59.0) |
| Unknown | 27 (16.8) | 8 (20.5) |
| Underlying diseases |  |  |  |
| Diabetes | 41 (25.5) | 5 (12.8) | 0.092 |
| Hypertension | 70 (43.5) | 15 (38.5) | 0.57 |
| Hyperlipidemia | 31 (19.3) | 9 (23.1) | 0.592 |
| Asthma | 18 (11.2) | 9 (23.1) | 0.051 |
| COPD | 35 (21.7) | 9 (23.1) | 0.856 |
| Preuse of antimicrobials (%) | 29 (18.0) | 3 (7.7) | 0.115 |
|
| Mortality (%) | 5 (3.1) | 2 (5.1) | 0.537 |
| CURB-65 (n, %) |  |  |  |
| ≤2 | 97 (72.9) | 22 (81.5) | 0.354 |
| ≥3 | 36 (27.1) | 5 (18.5) |
| Region |  |  |  |
| Hokkaido | 28 (17.4) | 2 (5.1) | 0.087 |
| Chiba | 101 (62.7) | 25 (64.1) | 0.94 |
| Kochi | 10 (6.2) | 6 (15.4) | 0.088 |
| Nagasaki | 22 (13.7) | 6 (15.4) | 0.81 |
|  |  |  |  |
| PPSV23-type serotype | 119 (73.9) | 22 (56.4) | 0.032 |
| Serotype 19F | 4 (2.4) | 9 (22.5) | <0.05 |
| 15A | 1 (0.6) | 8 (20.0) | <0.05 |
| 35B | 8 (4.9) | 6 (15.0) | <0.05 |
| 6B | 9 (5.5) | 5 (12.5) | 0.116 |
| 23F | 4 (2.4) | 3 (7.5) | 0.115 |
| 6A | 2 (1.2) | 2 (5.0) | 0.122 |
| 11A | 18 (11.0) | 2 (5.0) | 0.254 |
| 23A | 5 (3.1) | 2 (5.0) | 0.543 |
| 19A | 9 (4.5) | 2 (5.0) | 0.9 |
| 14 | 5 (3.1) | 1 (2.5) | 0.854 |

Median age was analyzed by the Wilcoxon rank sum test, and other data were analyzed by the chi- square test.

Patients with an unknown history of previous PPSV23 were counted as having no history.

Serotypes that have both β-lactam-susceptible strains and β-lactam-nonsusceptible strains are shown.

CAP: community-acquired pneumonia, PPSV23: 23-valent pneumococcal polysaccharide vaccine,

COPD: chronic obstructive pulmonary disease
