# Supplementary figures and images for: Multiple clonal types of nonvaccine serotypes constitute β-lactams nonsusceptible pneumococcus isolates from adult pneumonia patients in Japan
Source: Research Square preprint supplement (doi:10.21203/rs.3.rs-453017/v1), 2021-05-07

Additional Figure 1. Selection flow chart of enrolled patients

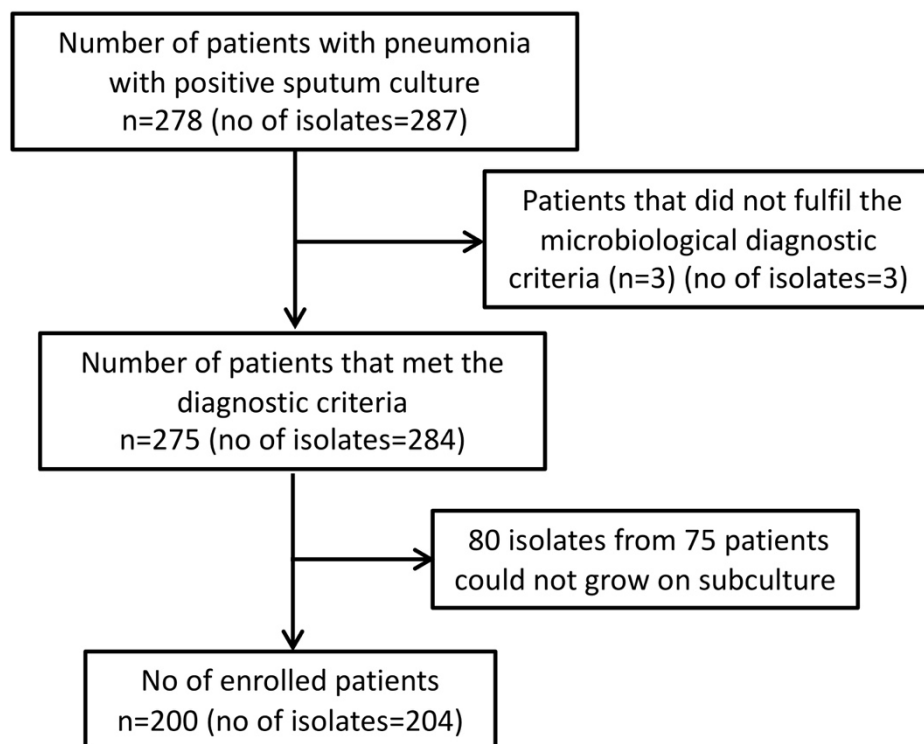

Supplement: Supplementary file 1 [file 52fe895ceeb5b89b559a105c.pdf]
